# Supplementary material for: IlAP2, an AP2/ERF Superfamily Gene, Mediates Cadmium Tolerance by Interacting with IlMT2a in Iris lactea var. chinensis
Source: MDPI journal article supplement (doi:10.3390/plants12040823), 2023-02-12
Supplement: s1 [file s1]

**Table S1** 1/2 Hoagland's solution composition

| <b>Nutrient elements</b>              | <b>Concentrations</b> |
|---------------------------------------|-----------------------|
| <b>Calcium Nitrate Tetrahydrate</b>   | 473                   |
| <b>Nitrate of Potash</b>              | 253                   |
| <b>Ammonium Nitrate</b>               | 40                    |
| <b>Potassium Dihydrogen Phosphate</b> | 68                    |
| <b>Magnesium Sulfate</b>              | 247                   |
| <b>Iron Vitriol</b>                   | 2780                  |
| <b>EDTA•Na</b>                        | 3730                  |
| <b>Potassium Iodide</b>               | 415                   |
| <b>Boric Acid</b>                     | 3.1                   |
| <b>Manganese Sulfate</b>              | 11.2                  |
| <b>Zinc Sulfate</b>                   | 4.3                   |
| <b>Sodium Molybdate</b>               | 0.13                  |
| <b>Copper Sulfate</b>                 | 0.013                 |
| <b>Cobalt Chloride</b>                | 0.013                 |
